# Supplementary material for: miR-196b target screen reveals mechanisms maintaining leukemia stemness with therapeutic potential
Source: PubMed Central journal article supplement — J Exp Med. 2018 Aug 6;215(8):2115–36. doi: 10.1084/jem.20171312 (PMC6080909; doi:10.1084/jem.20171312), 2018-08-06
Supplement: JEM_20171312_sm.pdf [file JEM_20171312_sm.pdf]

## Supplemental material

Meyer et al., <https://doi.org/10.1084/jem.20171312>

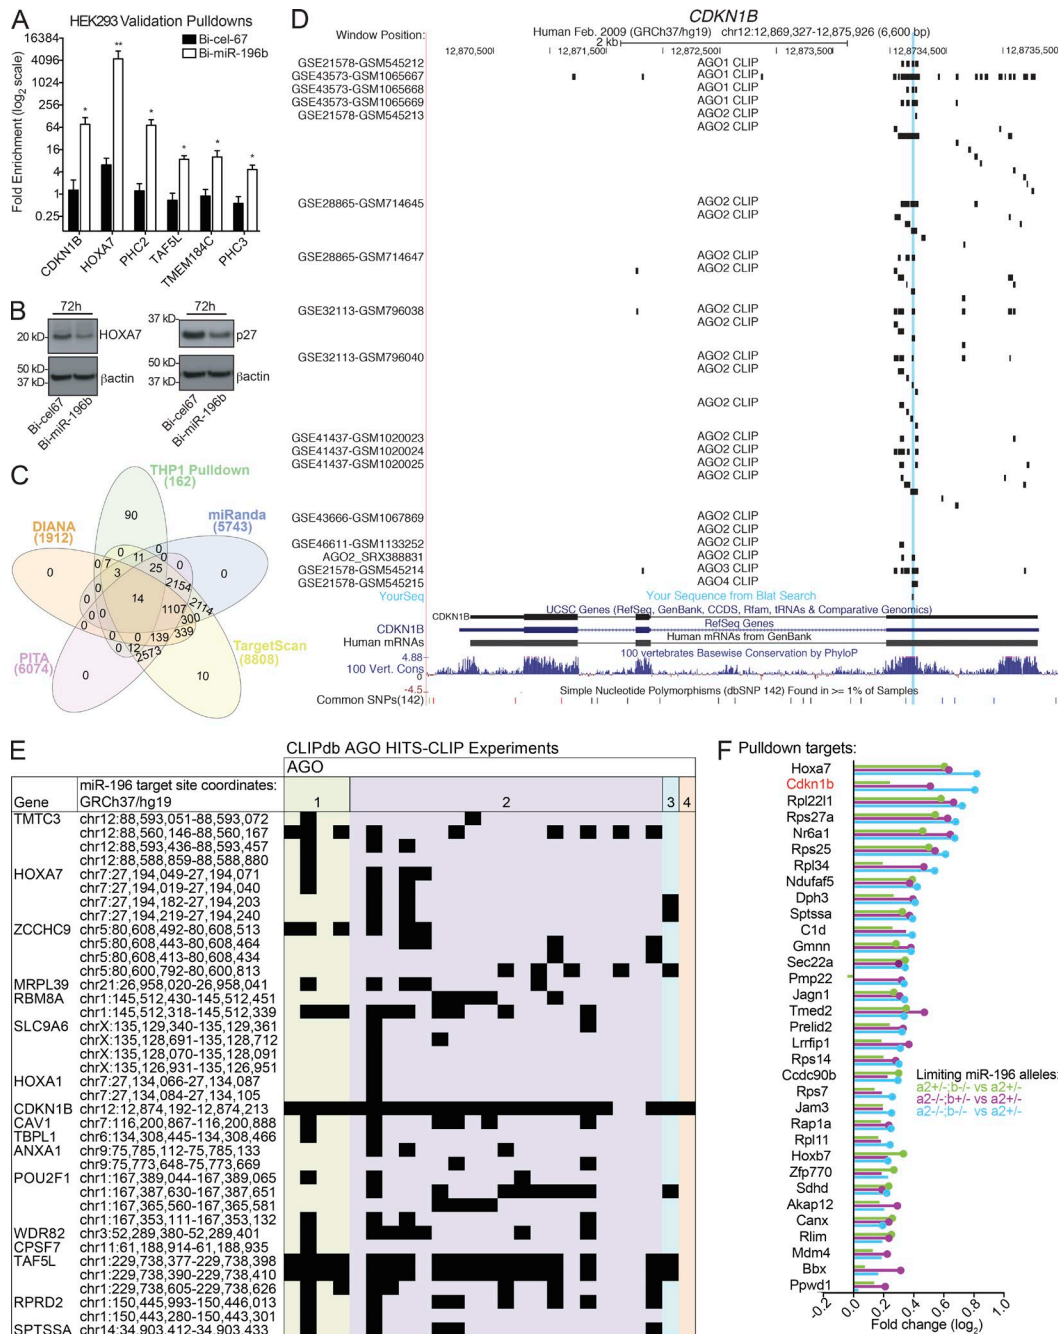

**Figure S1. Optimization, characterization, and corroboration of biotinylated miRNA mimic target pulldown approach.** (A) The average  $\pm$  SEM fold pulldown by RT-qPCR relative to matched input controls for each Bi-cel-67 control (black bars) and Bi-miR-196b mimic (white bars) in three to four independent pulldowns in HEK293 cells. Statistical significance by paired *t* tests for each gene versus Bi-cel-67 control. Results shown are an average of at least three independent experiments. \*,  $P \leq 0.05$ ; \*\*,  $P \leq 0.01$ . (B) Immunoblot analyses for known (HOXA7) and pulldown-identified (p27) miR-196b targets were performed on whole cell lysates from HEK293T cells transfected with indicated Bi-miR mimics ( $\beta$ -actin served as loading control). A representative of two independent experiments is shown. (C) Venn diagram of miR-196b pulldown targets in THP1 cells from Fig. 1 B, with target algorithm predicted miR-196b targets from four different algorithms: DIANA, miRanda, PITA, and TargetScan. (D and E) AGO CLIP sequencing data from CLIPdb<sup>52</sup> (Table S1) was manually searched using BLAT in UCSC Genome Browser for miR-196b binding sites in pulldown targets identified in human AML cells from Fig. 1 B. Example UCSC Genome Browser AGO CLIP tracks for pulldown target *CDKN1B* in D shows overlap of AGO binding with miR-196b target site (blue highlight). The process was repeated for several Bi-miR-196b pulldown targets, and the chart in E summarizes the results for each candidate miR-196b binding site (genomic coordinates). The AGO CLIP-Seq dataset(s) in CLIPdb with corresponding AGO binding site overlap are indicated for each (black squares). (F) Mouse orthologues of the top 500 target genes identified by biotinylated miR-196b pulldowns in human AML cells, were queried in quantitative gene expression datasets generated from E9.5 miR-196 mutant mouse embryos by RNA-seq. *miR-196a2*<sup>-/-</sup> control ( $n = 5$ ) were compared with embryos with limiting alleles of miR-196 (*196a2*<sup>+/-</sup>;*b*<sup>-/-</sup>, *196a2*<sup>-/-</sup>;*b*<sup>+/-</sup>, or *196a2*<sup>+/-</sup>;*b*<sup>+/-</sup>;  $n = 4$ /genotype). Genotype comparisons are color coded, filled circle at the tips of fold changes represent a statistically significant change at  $q < 0.05$ . Only genes that pass expression threshold requirements and exhibit significant up-regulated expression in at least one genotype comparison are displayed. *Cdkn1b* is highlighted (red) within this list.

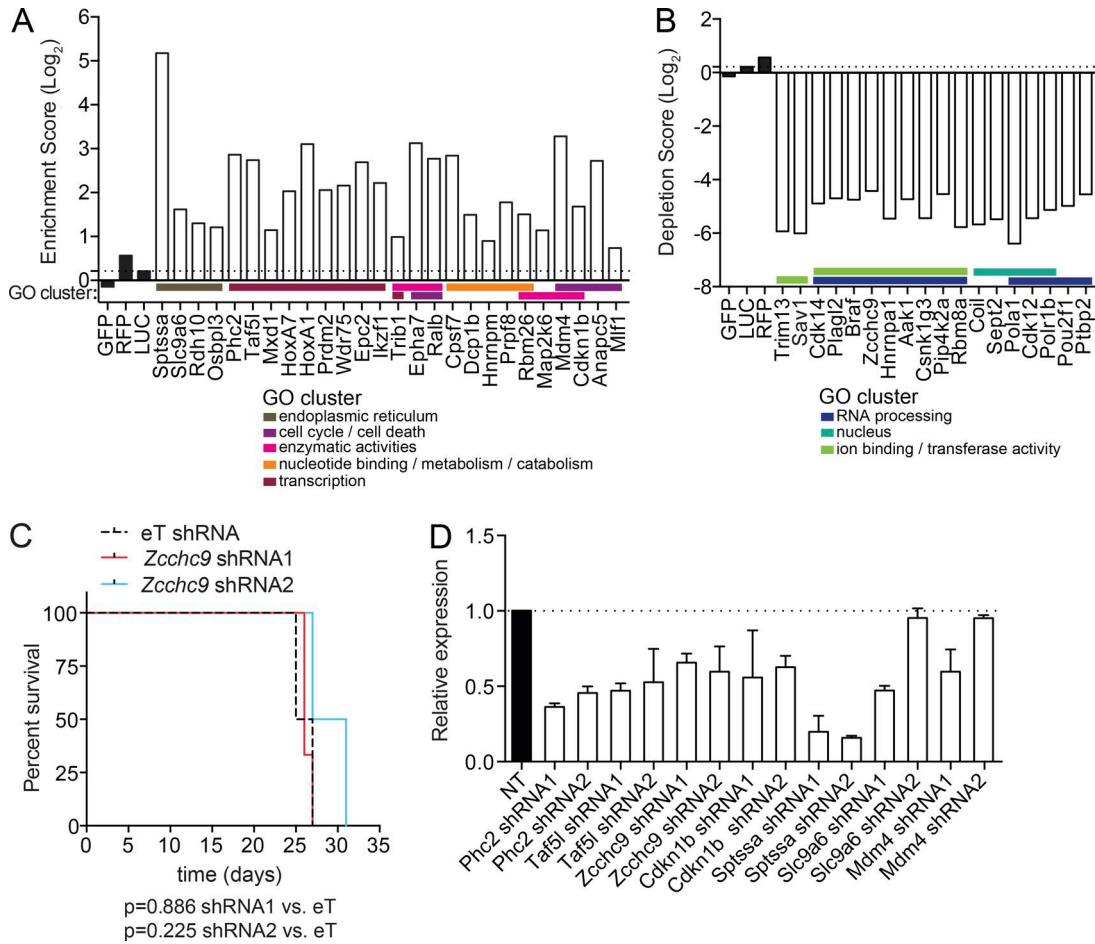

Figure S2. **shRNA knockdown of miR-196b pull-down targets in MLL-AF9 AML.** In vivo shRNA screening of AML-116 miR-196b pull-down targets was performed in murine MLL-AF9 leukemic splenocytes. **(A and B)** The average log<sub>2</sub> RNAi screen enrichment (A) and depletion scores (B) of representative hairpins/gene within GO clusters compared with average hairpins/gene scores of three controls (GFP, LUC, and RFP; black bars). The dotted lines denote the average scores of control hairpins. **(C)** Survival curves of mice transplanted with MLL-AF9 leukemia cells expressing shRNA against *Zcchc9* or eT control ( $n = 3-4$  mice/group). *Zcchc9* shRNA are a representative example of a gene whose hairpins were depleted from MLL-AF9 leukemia in the shRNA screen, and as anticipated, its knockdown does not accelerate leukemogenesis. No significant differences were detected between groups by Log-rank (Mantel-Cox) text. **(D)** shRNA activity was independently validated by TaqMan on leukemic splenocytes from at least two moribund mice each in Fig. 2 (D-G) and Fig. S2 C. *Sdha* served as a loading control, and shRNA-mediated knockdown is shown as relative to NT control mice for each gene. eT and LUC negative control shRNA showed similar gene expression as NT (data not shown).

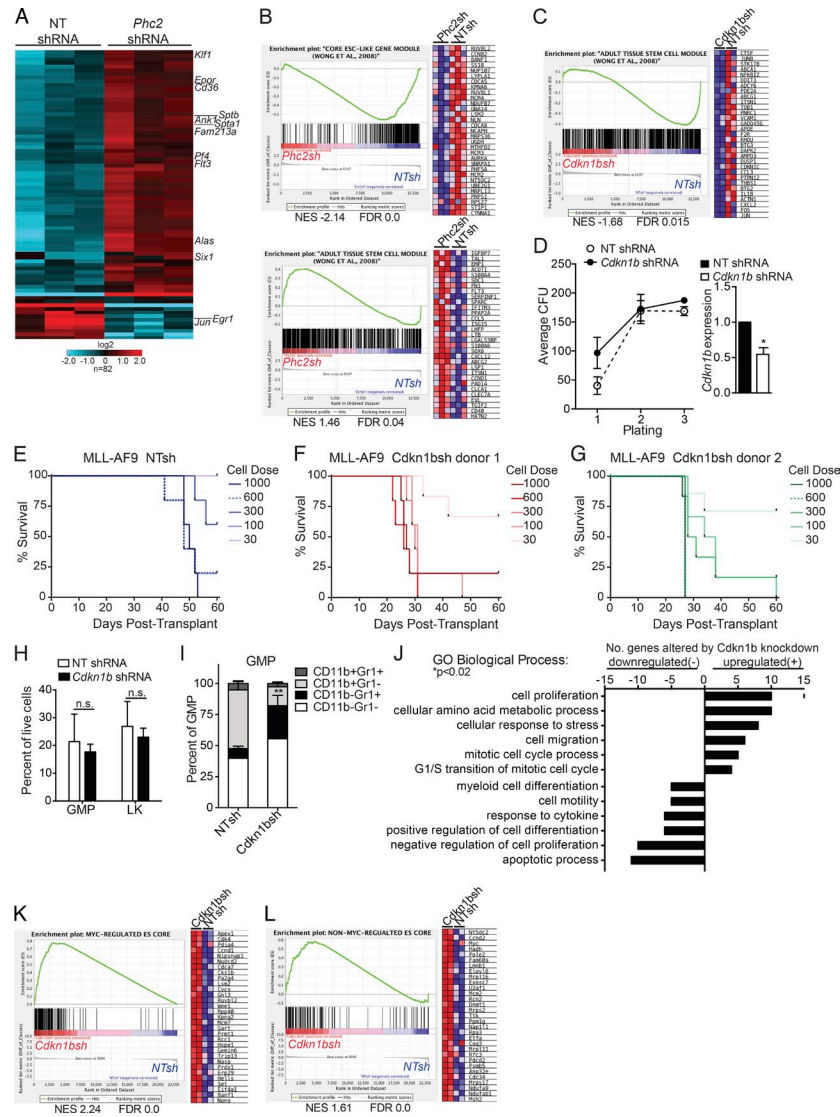

**Figure S3. Effects of *Cdkn1b* knockdown on MLL-AF9 transcriptional programming and immunophenotype.** (A) Heat map of  $\log_2$  gene expression in *Phc2* shRNA-knockdown and NT control leukemias. Hierarchical clustering of 82 differentially expressed genes showing greater than twofold change in expression by RNA-Seq analysis of NT shRNA control ( $n = 3$ ) or *Phc2* shRNA ( $n = 3$ ) expressing MLL-AF9 leukemic splenocytes. (B) GSEA analyses plots ranking ESC core gene set (upper) and adult tissue stem cell gene set (lower) along descending fold change gene expression in *Phc2*-knockdown ( $n = 3$  mice) versus NT control ( $n = 3$  mice) MLL-AF9 leukemias by RNA-Seq. Expression of the top subset of leading edge genes in the *Phc2* shRNA (*Phc2sh*) or control NT shRNA (NTsh) MLL-AF9 leukemias is shown for each GSEA. NES, normalized enrichment score. (C) GSEA plot ranking adult tissue stem cell gene set along descending fold change gene expression in *Cdkn1b*-knockdown versus NT control leukemias by RNA-seq ( $n = 2$  mice/group). Expression of the top subset of leading edge genes in the *Cdkn1b* shRNA (*Cdkn1bsh*) or control NT shRNA (NTsh) MLL-AF9 leukemias is shown for each GSEA. (D) MLL-AF9 leukemic splenocytes transduced with NT shRNA control or *Cdkn1b* shRNA lentiviruses, puromycin selected, and  $3 \times 10^3$  cells/group were plated in methylcellulose colony forming assays (CFU). Left, average CFU  $\pm$  SEM of NT (dashed line) or *Cdkn1b* (solid line) shRNA transduced MLL-AF9 cells performed in triplicate. Cells were replated in triplicate for a total of three platings. A representative of two independent experiments is shown. Two-way ANOVA Bonferroni's multiple comparisons test was used to evaluate statistical significance, no differences were detected. Right, RNA was isolated from NT or *Cdkn1b* shRNA MLL-AF9 cells after serial replating, and *Cdkn1b* expression measured by TaqMan. Two technical replicates are shown as representative of at least two independent experiments with similar results. *Sdha* served as a loading control and expression is shown relative to NT control. \*,  $P \leq 0.05$  by *t* test. (E-G) Survival curves of mice ( $n = 6$ /cell dose per shRNA) transplanted with the indicated number of NTsh (E), *Cdkn1bsh* donor 1 (F), or *Cdkn1bsh* donor 2 (G) MLL-AF9 AML cells. (H and I) Leukemic splenocytes harvested from moribund NT shRNA control and *Cdkn1b*-knockdown mice were evaluated by flow cytometric analyses for differences in progenitor gate populations LK and GMP (H) and myeloid differentiation markers CD11b and Gr1 on leukemic GMP-gate cells (I). The average percentages of the indicated populations  $\pm$  SEM are shown ( $n = 3$ /group). Statistically significant differences between NT shRNA and *Cdkn1b* shRNA groups were evaluated by *t* test for LK, GMP-gate in H, and two-way ANOVA Bonferroni's multiple comparisons test was used to determine significant differences between NT and *Cdkn1b* shRNA groups for each population in I. \*\*,  $P \leq 0.01$ . n.s., not significant. (J) Gene ontology analyses of differentially expressed genes from RNA-Seq analyses of *Cdkn1b*-knockdown MLL-AF9 leukemia cells compared with NT control ( $n = 2$  mice/group; Fig. 3 A). GO biological processes are reported as a bar graph showing the number of up-regulated (+) or down-regulated (-) genes. (K and L) GSEA analyses plots ranking along descending fold change gene expression in *Cdkn1b*-knockdown MLL-AF9 cells compared with NTsh MLL-AF9 control ( $n = 2$  mice/group). Gene sets were derived from the Wong ESC core gene set (from Fig. 3 B) divided into two groups: Myc-regulated target genes (K) or non-Myc-regulated target genes (L). Expression of the top subset of leading edge genes is shown for each GSEA.

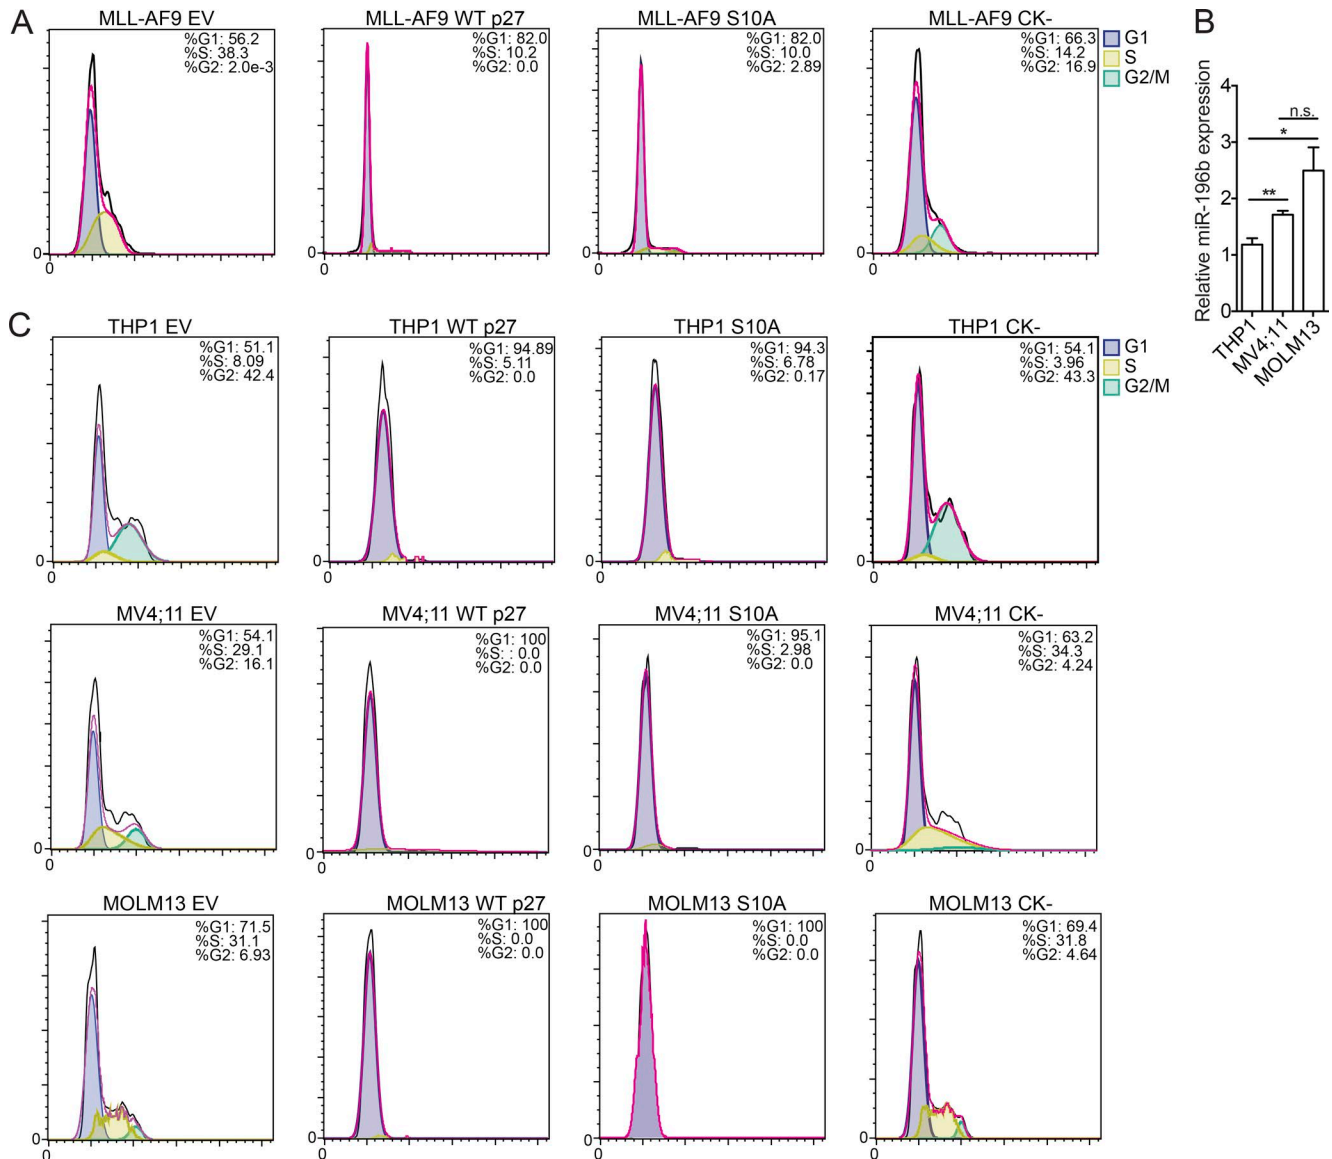

Figure S4. **p27<sup>Kip1</sup> induces cyclin/cdk-dependent cell cycle arrest in MLL-r AML.** (A) Representative histograms of Vybrant DyeCycle DNA dye stained ZsGreen<sup>+</sup> murine MLL-AF9 cells at 48 h after transduction with EV, WT p27, S10A, and CK<sup>-</sup> lentiviruses. Areas used to calculate the percentage of cells in each cell cycle stage are indicated for G1 (purple), S (yellow), and G2/M (green). The percent of cells per cell cycle stage are indicated in the upper right corner of each histogram. The experiment was repeated at least twice with similar results. (B) Average relative expression of miR-196b ± SEM by RT-qPCR analyses of RNA isolated from human AML cell lines THP1, MV4;11, and MOLM13. Results are average of two independent experiments. Significant differences were evaluated by parametric unpaired t tests. \*, P ≤ 0.05; \*\*, P ≤ 0.01. n.s., not significant. (C) Representative histograms of Vybrant DyeCycle DNA dye stained ZsGreen<sup>+</sup> THP1, MV4;11, and MOLM13 cells at 48 h post-transduction with EV, WT p27, S10A, or CK<sup>-</sup> lentiviruses. Areas used to calculate the percentage of cells in each cell cycle stage are indicated for G1 (purple), S (yellow), and G2/M (green). The percent of cells per cell cycle stage are indicated in the upper right corner of each histogram. The experiment was repeated at least twice with similar results.

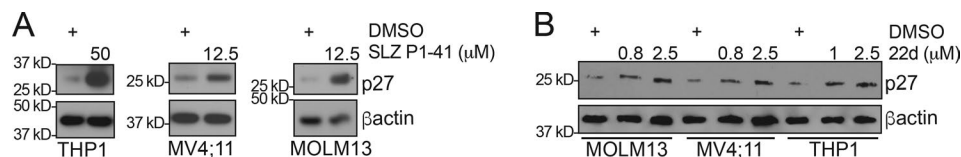

Figure S5. **p27<sup>Kip1</sup> levels in human AML treated with SCF<sup>Skp2</sup> inhibitors.** Immunoblots for p27 and loading control β-actin on protein lysates generated from THP1, MV4;11, and MOLM13 human AML cells after 24 h treatment with SLZ P1-41 (A) or 22d (B). SLZ P1-41 doses chosen for immunoblot were based on the lowest dose to achieve a significant reduction in cell viability as indicated by black arrows in Fig. 5 B. 22d doses were chosen based on mid and high used in synergy assays in Fig. 5 (C-E). A representative of two independent experiments is shown.

Tables S1, S2, and S3 are included as separate Excel files. Table S1 shows AGO-CLIP-Seq datasets from CLIPdb. Table S2 shows differentially expressed genes in Cdkn1b shRNA expressing MLL-AF9 AML compared with NT shRNA control AML. Table S3 presents Skp2 inhibitor 22d synergy drug analyses in combination with I-BET151, MI-1, or Palbociclib.

## References

- Agarwal, V., G.W. Bell, J.W. Nam, and D.P. Bartel. 2015. Predicting effective microRNA target sites in mammalian mRNAs. *eLife*. 4:e05005. <https://doi.org/10.7554/eLife.05005>
- Betel, D., M. Wilson, A. Gabow, D.S. Marks, and C. Sander. 2008. The microRNA.org resource: targets and expression. *Nucleic Acids Res.* 36(Database):D149–D153. <https://doi.org/10.1093/nar/gkm995>
- Enright, A.J., B. John, U. Gaul, T. Tuschl, C. Sander, and D.S. Marks. 2003. MicroRNA targets in Drosophila. *Genome Biol.* 5:R1. <https://doi.org/10.1186/gb-2003-5-1-r1>
- John, B., A.J. Enright, A. Aravin, T. Tuschl, C. Sander, and D.S. Marks. 2004. Human MicroRNA targets. *PLoS Biol.* 2:e363. <https://doi.org/10.1371/journal.pbio.0020363>
- Kim, J., J. Chu, X. Shen, J. Wang, and S.H. Orkin. 2008. An extended transcriptional network for pluripotency of embryonic stem cells. *Cell.* 132:1049–1061. <https://doi.org/10.1016/j.cell.2008.02.039>
- Kim, J., A.J. Woo, J. Chu, J.W. Snow, Y. Fujiwara, C.G. Kim, A.B. Cantor, and S.H. Orkin. 2010. A Myc network accounts for similarities between embryonic stem and cancer cell transcription programs. *Cell.* 143:313–324. <https://doi.org/10.1016/j.cell.2010.09.010>
- Lewis, B.P., I.H. Shih, M.W. Jones-Rhoades, D.P. Bartel, and C.B. Burge. 2003. Prediction of mammalian microRNA targets. *Cell.* 115:787–798. [https://doi.org/10.1016/S0092-8674\(03\)01018-3](https://doi.org/10.1016/S0092-8674(03)01018-3)
- Lewis, B.P., C.B. Burge, and D.P. Bartel. 2005. Conserved seed pairing, often flanked by adenosines, indicates that thousands of human genes are microRNA targets. *Cell.* 120:15–20. <https://doi.org/10.1016/j.cell.2004.12.035>
- Maragkakis, M., M. Reczko, V.A. Simossis, P. Alexiou, G.L. Papadopoulos, T. Dalamagas, G. Giannopoulos, G. Goumas, E. Koukis, K. Kourtis, et al. 2009b. DIANA-microT web server: elucidating microRNA functions through target prediction. *Nucleic Acids Res.* 37(Web Server):W273–276. <https://doi.org/10.1093/nar/gkp292>
- Papadopoulos, G.L., P. Alexiou, M. Maragkakis, M. Reczko, and A.G. Hatzigeorgiou. 2009. DIANA-mirPath: Integrating human and mouse microRNAs in pathways. *Bioinformatics.* 25:1991–1993. <https://doi.org/10.1093/bioinformatics/btp299>
- Somerville, T.C., and M.L. Cleary. 2006. Identification and characterization of leukemia stem cells in murine MLL-AF9 acute myeloid leukemia. *Cancer Cell.* 10:257–268. <https://doi.org/10.1016/j.ccr.2006.08.020>
